# Supplementary material
Source: publisher site journal article supplement (https://www.dovepress.com/article/547830)
Supplement: Supplementary file 1 [file Supplementary%20materials.docx]

**Supplementary Table 1.**

Baseline characteristics of participants after propensity score matching

| **Variables** | **Total** | **Sarcopenia** | **Non-Sarcopenia** | ***P* value** |
| --- | --- | --- | --- | --- |
|  | n＝286 | n＝143 | n＝143 |  |
| Age (years) | 72.44 ± 7.11 | 72.28 ± 7.43 | 72.61 ± 6.80 | 0.630 |
| Gender, n (%) |  |  |  | 0.906 |
| Male | 137 (47.9) | 68 (47.6) | 69 (48.3) |  |
| Female | 149 (52.1) | 75 (52.4) | 74 (51.7) |  |
| BMI (kg/m2) | 22.79 ± 2.81 | 22.76 ± 2.73 | 22.83 ± 2.90 | 0.842 |
| WHR | 0.90 ± 0.08 | 0.90 ± 0.09 | 0.90 ± 0.07 | 0.406 |
| Education level, n (%): |  |  |  | 0.311 |
| Primary school or below | 92 (32.2) | 50 (35.0) | 42 (29.4) |  |
| Middle school or above | 194 (67.8) | 93 (65.0) | 101 (70.6) |  |
| Marital status, n (%): |  |  |  | 0.417 |
| Married | 241 (84.3) | 118 (82.5) | 123 (86.0) |  |
| Divorced/ Widowed/ Unmarried | 45 (15.7) | 25 (17.5) | 20 (14.0) |  |
| Smoke, n (%): |  |  |  | 1.000 |
| Yes | 34 (11.9) | 17 (11.9) | 17 (11.9) |  |
| No | 252 (88.1) | 126 (88.1) | 126 (88.1) |  |
| Drink, n (%): |  |  |  | 0.834 |
| Yes | 25 (8.7) | 13 (9.1) | 12 (8.4) |  |
| No | 261 (91.3) | 130 (90.9) | 131 (91.6) |  |
| Exercise, n (%): |  |  |  | 0.231 |
| Yes | 120 (42.0) | 55 (38.5) | 65 (45.5) |  |
| No | 166 (58.0) | 88 (61.5) | 78 (54.5) |  |
| AST/ALT ratio | 1.26 ± 0.37 | 1.24 ± 0.33 | 1.28 ± 0.40 | 0.908 |
| SCr (μmol/L) | 78.47 ± 26.47 | 77.13 ± 28.57 | 79.82 ± 24.22 | 0.066 |
| BUN (mmol/L) | 5.95 ± 1.82 | 6.02 ± 1.96 | 5.88 ± 1.67 | 0.797 |
| TC (mmol/L) | 4.90 ± 1.11 | 4.95 ± 1.06 | 4.86 ± 1.15 | 0.512 |
| TG (mmol/L) | 1.52 ± 1.05 | 1.52 ± 1.01 | 1.52 ± 1.10 | 0.659 |
| LDL (mmol/L) | 2.86 ± 0.89 | 2.90 ± 0.88 | 2.83 ± 0.91 | 0.537 |
| HDL (mmol/L) | 1.46 ± 0.35 | 1.46 ± 0.35 | 1.45 ± 0.34 | 0.969 |
| Grip strength (kg) | 25.19 ± 8.64 | 22.04 ± 7.78 | 28.36 ± 8.33 | <0.001 |
| Walking speed (m/s) | 1.02 ± 0.22 | 0.92 ± 0.20 | 1.11 ± 0.19 | <0.001 |
| ASMI (kg/m2) | 6.32 ± 0.98 | 5.85 ± 0.77 | 6.80 ± 0.94 | <0.001 |
| Hypertension, n (%) |  |  |  | 0.552 |
| Yes | 157 (54.9) | 81 (56.6) | 76 (53.1) |  |
| No | 129 (45.1) | 62 (43.4) | 67 (46.9) |  |
| Diabetes, n (%) |  |  |  | 0.802 |
| Yes | 96 (33.6) | 47 (32.9) | 49 (34.3) |  |
| No | 190 (66.4) | 96 (67.1) | 94 (65.7) |  |
| Nephrolithiasis, n (%) |  |  |  | 0.003 |
| Yes | 24 (8.4) | 19 (13.3) | 5 (3.5) |  |
| No | 262 (91.6) | 124 (86.7) | 138 (96.5) |  |

Data were presented as mean ± standard deviation or number with percentage in parenthesis. The Mann-Whitney *U* test or independent samples *t*-test was used to determine differences for continuous variables. For categorical variables, Chi-square was used.

BMI, body mass index; WHR, waist-to-hip ratio; AST/ALT ratio, aspartate aminotransferase/alanine aminotransferase ratio; SCr, serum creatinine; BUN, blood urea nitrogen; TC, total cholesterol; TG, triglyceride; LDL, low-density lipoprotein cholesterol; HDL, high-density lipoprotein cholesterol; ASMI, appendicular skeletal muscle mass index.
